# Plantar Tissue Thickness Is Related to Peak Plantar Pressure in the High-Risk Diabetic Foot

FRAG ABOUAESHA, MRCP<sup>1</sup>  
CARINE H.M. VAN SCHIE, PHD<sup>1</sup>  
GARETH D. GRIFFITHS, FRCS<sup>2</sup>

ROBERT J. YOUNG, MD<sup>3</sup>  
ANDREW J.M. BOULTON, MD<sup>1</sup>

**OBJECTIVE** — To investigate the relationship among plantar foot pressure, plantar subcutaneous tissue thickness, severity of neuropathy (vibration perception threshold [VPT]), callus, and BMI in a large group of neuropathic diabetic patients at risk of foot ulceration.

**RESEARCH DESIGN AND METHODS** — A total of 157 diabetic neuropathic patients (VPT >25 V) without either peripheral vascular or ulcer history were studied. Plantar foot pressure and plantar tissue thickness were measured at each metatarsal head (MTH) using an optical pedobarograph and an ultrasound scanning platform, respectively.

**RESULTS** — A significant association was observed between peak plantar pressure and plantar tissue thickness at all MTHs ( $-0.26 < r < -0.61$ ,  $P < 0.0001$ ), with the least pronounced association at the first MTH. In addition, the pressure time integral was significantly associated with plantar tissue thickness ( $-0.24 < r < -0.57$ ,  $P < 0.0001$ ). BMI was significantly related to plantar tissue thickness ( $0.18 < r < 0.45$ ,  $P < 0.05$ ), but not to peak forefoot pressures. Subjects with callus had significantly reduced plantar tissue thickness at all MTHs except the first MTH and increased peak pressures at all MTHs ( $P < 0.001$ ).

**CONCLUSIONS** — This study confirms a strong inverse relationship between plantar tissue thickness and dynamic foot pressure measurements. Long-term follow-up of this patient population will confirm whether reduced plantar tissue thickness predicts the development of diabetic foot ulcers.

*Diabetes Care* 24:1270–1274, 2001

Diabetes is a common condition affecting patients in the developed and developing world. Complications affecting the lower limb are among the most common manifestations of diabetes, and those precipitated by neuropathy include ulceration, infection, and even amputation. It is estimated that foot ulceration occurs in up to 15% of diabetic patients during their lifetime and that such patients are 15–46 times more likely to have an amputation than nondiabetic patients (1). Moreover, about one in five hospitalizations among diabetic patients

are directly related to foot ulceration, making this the most common reason for diabetes-related hospital admission in some regions. The costs of treating these complications accounts for ~25% of the hospital costs of diabetes care, but the indirect costs can be much more (2). Therefore, identification of patients at risk of foot ulceration can help us to focus our efforts in preventing ulcers in such patients.

A number of risk factors have been examined and found to be associated with diabetic foot ulceration, including peripheral neuropathy (3), previous ulceration,

high dynamic plantar foot pressures (4), and limited joint mobility (5). Peripheral neuropathy is the most important component cause of foot ulceration, as well as foot deformity and trauma (6). The plantar surface of the foot is the most common site of neuropathic foot ulcers, especially the area under the metatarsal heads (MTHs). Peripheral neuropathy is associated with hyperextension of the metatarsophalangeal joints, clawing of the toes, and distal migration of the fibro-fatty pad on the plantar aspect of the forefoot. This process may subsequently lead to increased forefoot pressures (7). Decreased sweating and dryness of skin secondary to autonomic neuropathy results in callus building up under areas of increased pressure, which in turn further increases the pressures (8,9).

Increased pressures under the MTHs have been shown prospectively to predict ulcer development (4,10), but pressure measurement devices are costly, not always readily available, require user expertise and patient cooperation, and can be time-consuming in use. Preliminary data from diabetic and rheumatoid arthritic patients suggested that plantar foot pressures are strongly associated with reduced plantar tissue thickness under the MTHs (11), although the numbers studied in that report were small. In addition, it has been suggested that disruption in the subcutaneous tissues with the development of microhemorrhages (12) may lead to the breaking down of the overlying skin, resulting in ulcer formation. In support of this hypothesis, diabetic patients, especially those with foot ulcers, have been reported to have reduced plantar soft tissue thickness compared with nondiabetic subjects, indicating that this could be an important contributing factor in the development of foot ulceration (13,14).

It is therefore suggested that measurement of plantar subcutaneous tissue thickness could be used to predict the risk of foot ulceration. Accordingly, we aimed to confirm the relationship between plantar tissue thickness and forefoot pressure in a large group of diabetic neuropathic

From the <sup>1</sup>Department of Medicine, Manchester Royal Infirmary, University of Manchester, Manchester; the <sup>2</sup>Vascular Surgical Unit, Ninewells Hospital, Dundee; and the <sup>3</sup>Diabetes Centre, Hope Hospital, Salford, U.K.

Address correspondence and reprint requests to Dr. Frag Abouaisha, Department of Medicine, Manchester Royal Infirmary, Oxford Road, Manchester, M13 9WL, U.K. E-mail: frag.abouaisha@man.ac.uk.

Received for publication 20 December 2000 and accepted in revised form 27 March 2001.

**Abbreviations:** MTH, metatarsal head; VPT, vibration perception threshold.

A table elsewhere in this issue shows conventional and Système International (SI) units and conversion factors for many substances.

**Table 1—Descriptive characteristics of patients included in the study**

| Group                                    | Total       |
|------------------------------------------|-------------|
| n                                        | 157         |
| Sex (M/F)                                | 73/27       |
| Type of diabetes                         |             |
| Type 1                                   | 22          |
| Type 2                                   | 78          |
| Duration of diabetes (years)             | 16.4 ± 10.3 |
| BMI                                      | 29.3 ± 5.0  |
| VPT (V)                                  | 34.8 ± 8.7  |
| Neuropathy disability score (maximum 10) | 7.0 ± 2.3   |

Data are % or mean ± SD.

patients at risk of foot ulceration. The data presented here are the baseline data of a longitudinal study.

## RESEARCH DESIGN AND METHODS

A total of 157 patients with diabetes were enrolled; 73% were men, with a mean age of  $61.2 \pm 10.2$  years. All patients had at least one palpable foot pulse and loss of protective sensation. Excluded were patients with an active or past history of foot ulcers, those with Charcot neuroarthropathy or foot surgery, as well as those who were unable to walk unaided. Patients underwent a neuropathic assessment, including the measurement of vibration perception threshold (VPT) on the tip of the hallux of both feet, using a neurothesiometer (Howell, London) (15), and the modified neurologic disability score (16). Loss of protective sensation was defined as a VPT  $>25$  V (3,15,17). The presence of callus was noted, and any significant buildup

was debrided before any of the assessments. Only callus present under the MTHs was used for later analysis, and callus was noted as a dichotomous variable: present or absent. Dynamic plantar pressures were measured during barefoot walking using the Optical Pedobarograph (Department of Medical Physics and Clinical Engineering, Royal Hallamshire Hospital, Sheffield, U.K.) (18). The pressure plate is built into an 8-m walkway and measures at a frequency of 25 Hz and a resolution of 2 mm<sup>2</sup>. Five steps were analyzed for each foot; any steps regarded as atypical by the investigator (e.g., subject tripping, substantially altering gait, or aiming for the pressure plate during data collection) were not saved and thus were not used for analysis. Peak pressure and pressure time integral were analyzed at each individual MTH. When addressing the area of interest for pressure analysis at each MTH, the cursor was used to select a circular MTH region; at no time was there any overlap among individual MTH pressure regions. Areas were carefully selected as previously described (19).

The plantar tissue thickness was measured under weight-bearing conditions at each MTH using the Planscan (Department of Medical Physics and Clinical Engineering, Royal Hallamshire Hospital) (20). The Planscan is a scanning platform that holds a high-resolution probe. The Toshiba SSA-240A ultrasound scanner with a 3.75-MHz curvilinear array transducer (Toshiba Medical Systems Europe) was used for the assessment. The subjects stood barefoot on the plastic barrier of the scanning platform, with the ultrasound transducer located underneath the upper

surface. The MTH of interest was positioned directly above the transducer, and the distance between the most prominent part of the MTH and the skin was determined as the plantar tissue thickness. Three measurements were obtained in the longitudinal plane of the metatarsal and averaged for subsequent analysis. The Planscan device is simple to use, and we experienced no problems with patients standing on the platform. The intra-observer coefficient of variation, assessed twice at a two-weekly intervals in 11 healthy control subjects, was  $<8\%$ , confirming the high degree of reproducibility.

Data are presented as means ± SD. Pearson's test was used to assess correlation between the continuous variables of peak plantar pressure under each MTH and plantar tissue thickness under the same site. Student's *t* tests were used for comparisons between the subjects with and without callus. For all calculations, we used an  $\alpha$  of 0.05.

**RESULTS**— Descriptive characteristics for this population are listed in Table 1. Average stance duration (mean ± SD) during the pressure measurements was  $860 \pm 127$  and  $865 \pm 129$  ms for the left and right foot, respectively. A pronounced negative correlation was observed between peak plantar pressure and plantar tissue thickness for the second, third, fourth, and fifth MTH ( $-0.430 < r < -0.605$ ,  $P < 0.0001$ ), whereas the correlation for the first MTH was significant but not as pronounced ( $r = -0.26$ ,  $P < 0.001$ ) (Table 2 and Fig. 1). In 41 patients, the tissue thickness at the sesamoid bones under the first MTH was also

**Table 2—Correlations between forefoot pressure and plantar tissue thickness by site**

| Site | Peak pressure left                         | Peak pressure right                        | Pressure-time integral (left)              | Pressure-time integral (right)             |
|------|--------------------------------------------|--------------------------------------------|--------------------------------------------|--------------------------------------------|
| MTH1 | $r = -0.29$ , $r^2 = 0.08$<br>$P < 0.0001$ | $r = -0.26$ , $r^2 = 0.07$<br>$P < 0.001$  | $r = -0.25$ , $r^2 = 0.06$<br>$P < 0.01$   | $r = -0.24$ , $r^2 = 0.06$<br>$P < 0.01$   |
| SESM | $r = -0.44$ , $r^2 = 0.19$<br>$P < 0.005$  | $r = -0.59$ , $r^2 = 0.34$<br>$P < 0.0001$ | $r = -0.28$ , $r^2 = 0.08$<br>$P = 0.078$  | $r = -0.52$ , $r^2 = 0.27$<br>$P < 0.01$   |
| MTH2 | $r = -0.56$ , $r^2 = 0.31$<br>$P < 0.0001$ | $r = -0.61$ , $r^2 = 0.37$<br>$P < 0.0001$ | $r = -0.52$ , $r^2 = 0.27$<br>$P < 0.0001$ | $r = -0.57$ , $r^2 = 0.32$<br>$P < 0.0001$ |
| MTH3 | $r = -0.55$ , $r^2 = 0.30$<br>$P < 0.0001$ | $r = -0.57$ , $r^2 = 0.32$<br>$P < 0.0001$ | $r = -0.51$ , $r^2 = 0.26$<br>$P < 0.0001$ | $r = -0.56$ , $r^2 = 0.31$<br>$P < 0.0001$ |
| MTH4 | $r = -0.43$ , $r^2 = 0.19$<br>$P < 0.0001$ | $r = -0.45$ , $r^2 = 0.20$<br>$P < 0.0001$ | $r = -0.39$ , $r^2 = 0.15$<br>$P < 0.0001$ | $r = -0.43$ , $r^2 = 0.18$<br>$P < 0.0001$ |
| MTH5 | $r = -0.49$ , $r^2 = 0.24$<br>$P < 0.0001$ | $r = -0.51$ , $r^2 = 0.26$<br>$P < 0.0001$ | $r = -0.47$ , $r^2 = 0.22$<br>$P < 0.0001$ | $r = -0.54$ , $r^2 = 0.29$<br>$P < 0.0001$ |

SESM, sesamoids (average of thickness of lateral and medial sesamoid).

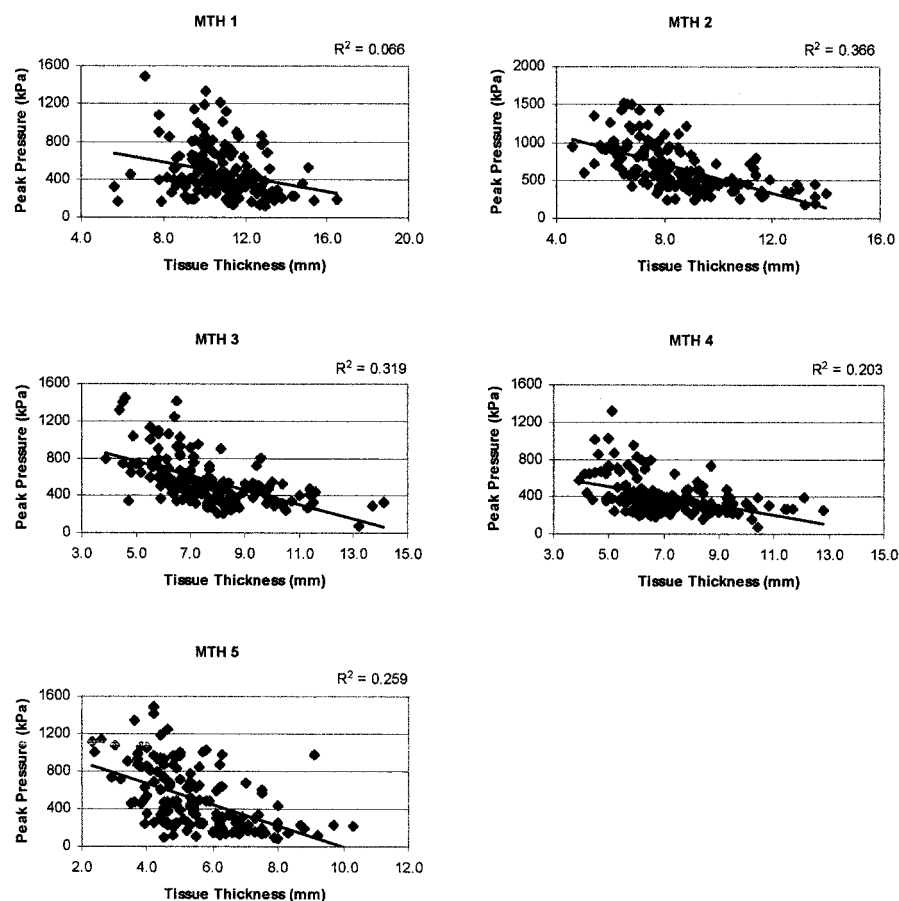

Figure 1—Correlation between plantar pressure and tissue thickness in the forefoot.

assessed in addition to that under the first MTH. The correlation between peak pressure at the first MTH and the average tissue thickness under the medial and lateral sesamoid bones was stronger ( $r = -0.437$  and  $r = -0.586$  for the left and right foot, respectively,  $P < 0.005$  and  $P < 0.0001$ ) than for the first MTH thickness itself (Table 2). The correlation between pressure time integral and plantar tissue thickness was significant for each MTH, and again the least pronounced correlation was at the first MTH (Table 2). The strength of association between plantar tissue thickness and pressure time integral was similar to the association between plantar tissue thickness and peak pressures.

BMI was significantly associated to plantar tissue thickness at all MTH sites, with correlations ranging from 0.175 to 0.428 ( $P < 0.01$  for all MTH, except  $P < 0.05$  for left first MTH) (Table 3). The least pronounced relationship was again observed at the first MTH, with a stronger relationship at the sesamoids. In contrast,

however, no relationship was observed between BMI and peak plantar pressure at any MTH site ( $-0.135 < r < 0.016$ ;  $0.101 < P < 0.988$ ), except for a weak correlation at the left first MTH ( $r = 0.195$ ,  $P = 0.017$ ).

Subjects with callus under the fore-

foot (at MTH sites) had significantly reduced plantar tissue thickness at the second, third, fourth, and fifth MTH (Table 4) but not at the first MTH. Furthermore, subjects with callus under the forefoot had significantly increased peak forefoot pressure at each MTH for both feet (Table 4).

There was a significant but weak correlation between severity of neuropathy (measured as VPT) and plantar tissue thickness at only 2 of the 10 MTH sites (right third MTH  $r = -0.17$ ,  $P = 0.030$ ; left first MTH  $r = -0.24$ ,  $P = 0.002$ ). There was no correlation between VPT and peak forefoot pressure for the left and right foot.

**CONCLUSIONS**— In this study of a large group of diabetic patients, a significant correlation was observed between plantar tissue thickness and variables for plantar pressures (peak pressure and pressure time integral) under the MTHs, confirming and extending the results of an earlier pilot study (11). It is interesting that whereas the most common site for pressure ulcers is the first MTH, the poorest correlation occurred under the first MTH bilaterally. This weaker correlation is most likely related to the presence of two sesamoid bones under the first MTH, which are more superficial and may accept a portion of the weight load (21). Initially, the tissue thickness was only measured under the MTHs, but after an interim analysis, our current practice changed to measure the tissue thickness under the MTHs as well as the sesamoids and take the mean value of the medial and lateral sesamoids. Analysis of the first 41

Table 3—Correlations between plantar tissue thickness and BMI by site

| Site | Left foot                                 | Right foot                                |
|------|-------------------------------------------|-------------------------------------------|
| MTH1 | $r = 0.18$ , $r^2 = 0.03$<br>$P < 0.05$   | $r = 0.25$ , $r^2 = 0.06$<br>$P < 0.005$  |
| SESM | $r = 0.41$ , $r^2 = 0.17$<br>$P < 0.0001$ | $r = 0.39$ , $r^2 = 0.15$<br>$P = 0.018$  |
| MTH2 | $r = 0.26$ , $r^2 = 0.07$<br>$P < 0.005$  | $r = 0.29$ , $r^2 = 0.08$<br>$P < 0.0001$ |
| MTH3 | $r = 0.40$ , $r^2 = 0.16$<br>$P < 0.0001$ | $r = 0.39$ , $r^2 = 0.15$<br>$P < 0.0001$ |
| MTH4 | $r = 0.37$ , $r^2 = 0.14$<br>$P < 0.0001$ | $r = 0.43$ , $r^2 = 0.19$<br>$P < 0.0001$ |
| MTH5 | $r = 0.32$ , $r^2 = 0.10$<br>$P < 0.0001$ | $r = 0.31$ , $r^2 = 0.10$<br>$P < 0.0001$ |

SESM, sesamoids (average of thickness of lateral and medial sesamoid).

**Table 4—Peak plantar pressure and plantar tissue thickness at each MTH for subjects with and without callus at MTH sites**

|                               | Side  | No callus  | Callus     |
|-------------------------------|-------|------------|------------|
| Peak pressure (kPa)           |       |            |            |
| Peak pressure forefoot (MTHs) | Left  | 776 ± 304‡ | 1001 ± 313 |
|                               | Right | 728 ± 269‡ | 1018 ± 264 |
| MTH1                          | Left  | 469 ± 285* | 592 ± 309  |
|                               | Right | 436 ± 247* | 550 ± 290  |
| MTH2                          | Left  | 583 ± 275‡ | 864 ± 360  |
|                               | Right | 563 ± 261‡ | 837 ± 306  |
| MTH3                          | Left  | 505 ± 214‡ | 721 ± 287  |
|                               | Right | 477 ± 178‡ | 724 ± 303  |
| MTH4                          | Left  | 368 ± 168* | 448 ± 238  |
|                               | Right | 372 ± 169* | 454 ± 235  |
| MTH5                          | Left  | 438 ± 301‡ | 598 ± 343  |
|                               | Right | 445 ± 296‡ | 631 ± 356  |
| Tissue thickness (mm)         |       |            |            |
| Sesamoids                     | Left  | 6.4 ± 1.7  | 5.5 ± 1.3  |
|                               | Right | 6.5 ± 1.7  | 5.5 ± 1.4  |
| MTH1                          | Left  | 11.1 ± 1.7 | 10.9 ± 1.4 |
|                               | Right | 11.0 ± 1.8 | 10.6 ± 1.7 |
| MTH2                          | Left  | 9.1 ± 1.8‡ | 7.9 ± 1.7  |
|                               | Right | 9.0 ± 2.0‡ | 7.7 ± 1.5  |
| MTH3                          | Left  | 8.1 ± 1.6‡ | 7.0 ± 1.4  |
|                               | Right | 8.1 ± 1.9‡ | 6.8 ± 1.5  |
| MTH4                          | Left  | 7.6 ± 1.5‡ | 6.7 ± 1.3  |
|                               | Right | 7.4 ± 1.8‡ | 6.6 ± 1.6  |
| MTH5                          | Left  | 5.9 ± 1.4‡ | 5.2 ± 1.2  |
|                               | Right | 5.6 ± 1.5* | 5.1 ± 1.3  |

Data are means ± SD. \* $P < 0.05$ ; † $P < 0.01$ ; ‡ $P < 0.0001$  callus vs. no callus.

measurements using this method showed a stronger correlation of plantar foot pressures and subcutaneous tissue thickness at the sesamoids. We believe that measuring tissue thickness under the first MTH as well as the sesamoid bones may assist in confirming or refuting this assumption.

It is, however, surprising to note that the inverse relationship between plantar tissue thickness and pressure time integral was not stronger than the correlation between plantar tissue thickness and peak pressure. Because the pressure time integral combines a measurement of time and magnitude of pressure, it was hypothesized that an early rise in pressure during stance caused by prominent MTHs would lead to an increased pressure time integral and not necessarily to an increase in peak pressure; the observed findings are therefore difficult to explain.

Because measurements of plantar pressure were made in a dynamic situation (i.e., during walking) and plantar tissue thickness was measured in a static situation (i.e., while standing), it is possi-

ble that the thickness as measured in the static situation was not the same as that measured in the dynamic situation during walking. Moreover, it may be that during walking, the plantar tissue between the MTH and the skin-floor interface was less or different from the thickness measured during standing, i.e., the MTH may move distally from the plantar tissue, although this is contrary to the established theory of plantar tissue moving distally of the MTHs in diabetic neuropathic patients with clawed toes and prominent MTHs. Indeed, a 46% reduction in plantar tissue thickness during walking has been reported, but this was only compared with non-weight-bearing and not with standing, as in our study (22).

The fact that only up to 37% of the variance of peak plantar pressure could be explained from the plantar tissue thickness could be related to this issue of walking versus standing. Tissue properties—a relatively new area of study—have been suggested to be an important contributing factor to diabetic foot ulceration and may

be as important as tissue thickness (23). However, plantar pressure is related to many different factors, such as walking speed, body weight, callus, and foot structure; therefore, it is not surprising that plantar tissue thickness, unquestionably an important factor related to plantar pressure, can only explain a relatively small amount of variation. In fact, in a report by Morag and Cavanagh (24), plantar tissue thickness alone was able to explain a somewhat smaller amount of the peak pressure variation compared with multiple structural and functional factors. Nevertheless, plantar tissue thickness is to date the strongest individual predictor of peak plantar pressure to be reported in the literature.

It was interesting to observe that whereas BMI was not related to peak pressure, it was significantly associated to plantar tissue thickness. This relationship between BMI and plantar tissue thickness could explain the lack of association between BMI and peak pressure, as reported in this study and by various other authors. The results of this study suggest that individuals with a higher BMI have more subcutaneous tissue thickness and consequently lower foot pressures.

The observation of increased plantar pressure in subjects with callus in this study was expected, thereby confirming previous reports (9,25). The reported relationship between callus and reduced tissue thickness is, however, a new observation, suggesting that callus builds up at sites with reduced cushioning in order to protect the skin from breaking down.

The lack of association between VPT and peak pressure or tissue thickness is probably due to patient selection because a VPT >25 V was an inclusion criterion; thus, only a relative small range of VPT was measured in this study. Whether diabetic neuropathy could lead to loss of plantar tissue thickness is not clear from this study. However, some authors have provided preliminary evidence of reduced subcutaneous tissue thickness in diabetic neuropathic patients compared with nonneuropathic and healthy control subjects (11,13,14).

Foot ulceration remains a leading cause of morbidity in diabetic patients. Pecoraro et al. (26) identified that non-healing foot ulcers preceded 85% of diabetic lower limb amputations. The aim set by the St. Vincent declaration was to reduce the number of amputations in Eu-



rope by 50% within 5 years (27). Although diabetic foot ulcers remain very difficult to heal and are associated with high recurrence rates, they remain potentially preventable. The first step in any prevention program involves screening diabetic patients for the presence of complications such as peripheral neuropathy. For this purpose, simple established screening tools could be used, such as VPT (15), 10-g monofilaments (28), and the presence of peripheral pulses and the ankle-brachial pressure index (29). The second step is to examine those patients with loss of protective sensation for the presence of associated and predictive risk factors for foot ulceration, such as foot deformity, limited joint mobility, presence of callus, and elevated foot pressures (4). A new potential screening technique for risk of ulceration has been presented in this report. The device used (Planscan) is relatively inexpensive, simple to use, portable, and can be made available to most diabetic clinics or radiology departments with ultrasound devices. Plantar tissue thickness was able to explain up to 37% of the variance of peak plantar pressure; although not very high, this is the strongest individual factor related to plantar pressure variables that has been reported to date. The use of the Planscan might prove to be a useful alternative tool to study and follow up the diabetic patients who are at risk of foot ulceration; however, this needs to be confirmed by prospective analysis of the patients involved in this study. Once a patient is found to have reduced plantar tissue thickness, then methods to increase tissue thickness or other methods of foot protection can be applied (19).

**Acknowledgments**— This study was funded by a grant from the National Health Service Executive North West/Research and Development Directorate.

We thank Dr. Ric Betts for his valuable comments about the Planscan. The Planscan can be ordered from the department of medical physics and clinical engineering, Royal Hallamshire Hospital, Sheffield, U.K.

## References

1. Bild DE, Selby JV, Sinnock P, Browner WS, Braveman P, Showstack JA: Lower-extremity amputations in people with diabetes: epidemiology and prevention. *Diabetes Care* 12:24–31, 1989
2. Songer TJ: The economic of diabetes care.

- In *International Textbook of Diabetes Mellitus*. Alberti KGMM, DeFronzo RA, Keen H, Zimmet P, Eds. Chichester, U.K., Wiley, 1992, p 1643–1654
3. Abbott CA, Vileikyte L, Williamson S, Carrington AL, Boulton AJM: Multicenter study of the incidence of and predictive risk factors for diabetic neuropathic foot ulceration. *Diabetes Care* 21:1071–1075, 1998
4. Veves A, Murray HJ, Young MJ, Boulton AJM: The risk of foot ulceration in diabetic patients with high foot pressure: a prospective study. *Diabetologia* 35:660–663, 1992
5. Birke JA, Franks BD, Foto JG: First ray joint limitation, pressure, and ulceration of the first metatarsal head in diabetes mellitus. *Foot Ankle Int* 16:277–284, 1995
6. Reiber GE, Vileikyte L, Boyko EJ, del Aguila M, Smith DG, Lavery LA, Boulton AJM: Causal pathways for incident lower-extremity ulcers in patients with diabetes from two settings. *Diabetes Care* 22:157–162, 1999
7. Masson EA, Hay EM, Stockley I, Veves A, Betts RP, Boulton AJM: Abnormal foot pressures alone may not cause ulceration. *Diabet Med* 6:426–428, 1989
8. Murray HJ, Young MJ, Hollis S, Boulton AJM: The association between callus formation, high pressures and neuropathy in diabetic foot ulceration. *Diabet Med* 13: 979–982, 1996
9. Young MJ, Cavanagh PR, Thomas G, Johnson MM, Murray H, Boulton AJM: The effect of callus removal on dynamic plantar foot pressures in diabetic patients. *Diabet Med* 9:55–57, 1992
10. Pham H, Armstrong DG, Harvey C, Harkless LB, Giurini JM, Veves A: Screening techniques to identify people at risk for diabetic foot ulceration: a prospective multicenter trial. *Diabetes Care* 23:606–611, 2000
11. Young MJ, Coffey J, Taylor PM, Boulton AJM: Weight bearing ultrasound in diabetic and rheumatoid arthritis patients. *Foot* 5:76–79, 1995
12. Brash PD, Foster JE, Vennart W, Daw J, Tooke JE: Magnetic resonance imaging reveals micro-haemorrhage in the feet of diabetic patients with a history of ulceration. *Diabet Med* 13:973–978, 1996
13. Gooding AW, Stess RM, Graf PM, Moss KM, Louie KS, Grunfeld C: Sonography of the sole of the foot: evidence for loss of foot pad thickness in diabetes and its relationship to ulceration of the foot. *Invest Radiol* 21:45–48, 1986
14. Brink T: Induration of the diabetic foot pad: another risk factor for recurrent neuropathic plantar ulcers. *Biomed Technik* 40: 205–209, 1995
15. Young MJ, Breddy JL, Veves A, Boulton AJM: The prediction of diabetic neuro-

- pathic foot ulceration using vibration perception thresholds: a prospective study. *Diabetes Care* 16:557–560, 1994
16. Young MJ, Boulton AJM, MacLeod AF, Williams DR, Sonksen PH: A multicentre study of the prevalence of diabetic peripheral neuropathy in the United Kingdom hospital clinic population. *Diabetologia* 36:150–154, 1993
17. Armstrong DG, Lavery LA, Vela SA, Quebedeaux TL, Fleischli JG: Choosing a practical screening instrument to identify patients at risk for diabetic foot ulceration. *Arch Int Med* 158:289–292, 1998
18. Veves A, Boulton AJM: The optical pedobarograph. *Clin Podiatr Med Surg* 10:463–470, 1993
19. van Schie CHM, Whalley A, Vileikyte L, Wignall T, Boulton AJM: Efficacy of injected liquid silicone in the diabetic foot to reduce risk factors for ulceration: a randomized double-blind placebo-controlled trial. *Diabetes Care* 23:634–638, 2000
20. Bygrave CJ, Betts RP: The plantar tissue thickness in the foot: a new ultrasound technique for loadbearing measurements and a metatarsal head depth study. *Foot* 2:71–78, 1992
21. Jahss M: The sesamoids of the hallux. *Clin Orthop* 157:88–97, 1981
22. Cavanagh PR: Plantar soft tissue thickness during ground contact in walking. *J Biomech* 33:623–628, 1999
23. Landsman AS, Meaney DF, Cargill RS, Macark EJ, Thibault LE: High strain rate tissue deformation: a theory on the mechanical etiology of diabetic foot ulcerations. *J Am Pod Med Assoc* 85:519–527, 1995
24. Morag E, Cavanagh PR: Structural and functional predictors of regional peak pressures under the foot during walking. *J Biomech* 32:359–370, 1999
25. Pitei DL, Foster A, Edmonds M: The effect of regular callus removal on foot pressures. *J Foot Ankle Surg* 38:251–255, 1999
26. Pecoraro RE, Reiber GE, Burgess EM: Pathways to diabetic limb amputation: basis for prevention. *Diabetes Care* 13: 513–521, 1990
27. World Health Organization (Europe) and International Diabetes Federation (Europe): diabetes care and research in Europe: the Saint Vincent declaration. *Diabet Med* 7:360, 1990
28. Litzelman DK, Marriott DJ, Vinicor F: Independent physiological predictors of foot lesions in patients with NIDDM. *Diabetes Care* 20:1273–1278, 1997
29. Mayfield JA, Reiber GE, Nelson RG, Greene T: A foot risk classification system to predict diabetic amputation in Pima Indians. *Diabetes Care* 19:704–709, 1996
